# Supplementary material for: Fluoxetine‐induced plasticity in the visual cortex outlasts the duration of the naturally occurring critical period
Source: PubMed Central journal article supplement — Eur J Neurosci. 2019 Aug 8;50(10):3663–73. doi: 10.1111/ejn.14512 (PMC6899674; doi:10.1111/ejn.14512), 2019-08-08
Supplement: EJN-50-3663-s001.pdf [file EJN-50-3663-s001.pdf]

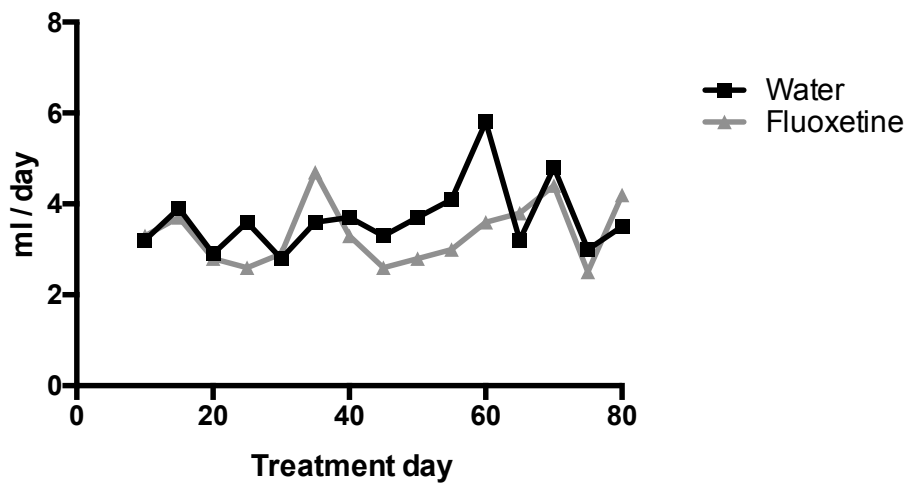

**FIG. S1.** Monitoring of the drining patterns during the experiment. Adding fluoxetine to the drinking water promote no changes in water consumption.

|                  | Fluoxetine | Norfluoxetine |
|------------------|------------|---------------|
|                  | ng/ml      | ng/ml         |
| 0 (bovine serum) | nd         | nd            |
| 24 h             | 101        | 908           |
| 48 h             | 44         | 665           |
| 72 h             | 1,7        | 258           |
| 7 d              | nd         | 2,7           |
| 14 d             | nd         | 1,7           |

**Table. S1** Fluoxetine and norfluoxetine concentrations in mouse blood serum after four-weeks treatment.

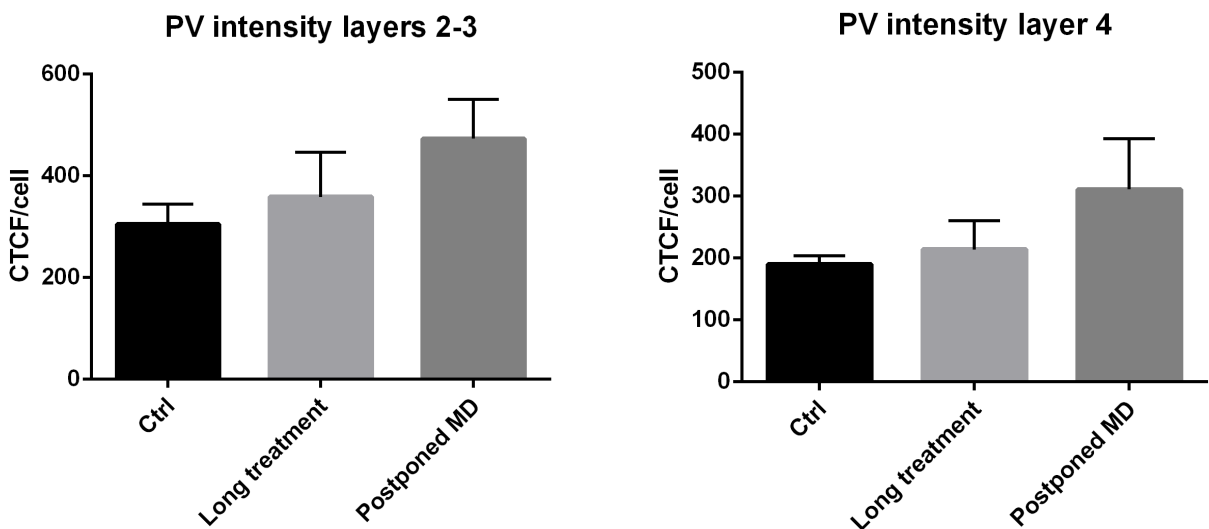

**FIG. S2.** No difference in intensity was found between the experimental groups in layer 4 and layers 2-3 (Kruskal-Wallis test;  $\pm$ SEM).
